# Supplementary material for: A bespoke mobile application for the longitudinal assessment of depression and mood during pregnancy: protocol of a feasibility study
Source: PubMed Central journal article supplement (PMC5729976; doi:10.1136/bmjopen-2016-014469), 2017-05-29
Supplement: bmjopen-2016-014469supp001.pdf [file bmjopen-2016-014469supp001.pdf]

## Appendix 1. Baseline assessments

### Socio-demographic survey

- What is your age group?
  - 18 to 22 years
  - 23 to 27 years
  - 28 to 32 years
  - 33 to 37 years
  - 38 years or older
- How would you describe your race or ethnicity?
  - White
    - British
    - Irish
    - Other
  - Mixed
    - White and Black Caribbean
    - White and Black African
    - White and Asian
    - Other
  - Asian or Asian British
    - Indian
    - Pakistani
    - Bangladeshi
    - Other
  - Black or Black British
    - Caribbean
    - African
    - Other
  - Chinese
  - Other
  - Prefer not to say
- What is your relationship status?
  - Single
  - Married/In a civil partnership
  - Living with partner
  - Divorced/Civil partnership that has been dissolved
  - Widowed
  - Separated
  - Prefer not to say
- What is your employment status?
  - Employed, full-time
  - Employed, part-time
  - Self-employed
  - Not employed, looking for work
  - Not employed, not looking for work
  - Disability/Not able to work

- What is your highest level of education?
  - Postgraduate – PhD/Doctorate
  - Postgraduate – Masters degree
  - University or college degree
  - University or college qualification below degree level
  - A Levels or equivalent
  - GCSE or equivalent
  - Other
  - None of these
- Do you own a smartphone (for example, an iPhone or Samsung phone)?
  - Yes
  - No
- Do you own a tablet computer (for example, an iPad)?
  - Yes
  - No
- How many times have you been pregnant (please count your current pregnancy)?
  - 1
  - 2
  - 3
  - 4 or more
- How many children have you given birth to?
  - 0
  - 1
  - 2
  - 3 or more
- When is your baby due? (please indicate month and year)
- Have you ever been diagnosed with depression?
  - Yes
  - No

### Whooley questions

- Over the past month, have you been bothered by feeling down, depressed or hopeless?
  - Yes
  - No
- Over the past month, have you been bothered by having little interest or pleasure in doing things?
  - Yes
  - No

### Edinburgh Postnatal Depression Scale

As you are pregnant or have recently had a baby, we would like to know how you are feeling. Please check the answer that comes closest to how you have felt IN THE PAST 7 DAYS, not just how you feel today.

In the past 7 days:

1. I have been able to laugh and see the funny side of things
  - a. As much as I always could
  - b. Not quite so much now
  - c. Definitely not so much now
  - d. Not at all
2. I have looked forward with enjoyment to things
  - a. As much as I ever did
  - b. Rather less than I used to
  - c. Definitely less than I used to
  - d. Hardly at all
3. I have blamed myself unnecessarily when things went wrong
  - a. Yes, most of the time
  - b. Yes, some of the time
  - c. Not very often
  - d. No, never
4. I have been anxious or worried for no good reason
  - a. No, not at all
  - b. Hardly ever
  - c. Yes, sometimes
  - d. Yes, very often
5. I have felt scared or panicky for no very good reason
  - a. Yes, quite a lot
  - b. Yes, sometimes
  - c. No, not much
  - d. No, not at all
6. Things have been getting on top of me
  - a. Yes, most of the time I haven't been able to cope at all
  - b. Yes, sometimes I haven't been coping as well as usual
  - c. No, most of the time I have coped quite well
  - d. No, I have been coping as well as ever
7. I have been so unhappy that I have had difficulty sleeping
  - a. Yes, most of the time
  - b. Yes, sometimes
  - c. Not very often
  - d. No, not at all
8. I have felt sad or miserable
  - a. Yes, most of the time
  - b. Yes, quite often
  - c. Not very often
  - d. No, not at all
9. I have been so unhappy that I have been crying
  - a. Yes, most of the time
  - b. Yes, quite often
  - c. Only occasionally
  - d. No, never
10. The thought of harming myself has occurred to me
  - a. Yes, quite often
  - b. Sometimes
  - c. Hardly ever
  - d. Never
